# Supplementary material for: Using molecular rotors to probe gelation
Source: Royal Society of Chemistry journal article supplement (doi:10.1039/c5sm00456j), 2015-01-01
Supplement: c5sm00456j1.pdf [file c5sm00456j1.pdf]

## Using Molecular Rotors to Probe Gelation

Jaclyn Raeburn,<sup>a</sup> Lin Chen,<sup>a</sup> Salmah Awhida,<sup>a</sup> Robert Deller,<sup>b</sup> Manu Vatish,<sup>c</sup> Matthew I. Gibson,<sup>b</sup> and Dave J. Adams<sup>a,\*</sup>

<sup>a</sup> Department of Chemistry, University of Liverpool, Crown Street, Liverpool, L69 7ZD, U.K.

<sup>b</sup> Department of Chemistry, University of Warwick, Coventry, CV4 7AL, U.K.

<sup>c</sup> Nuffield Department of Obstetrics & Gynaecology, University of Oxford, Oxford, UK

### Supporting Information

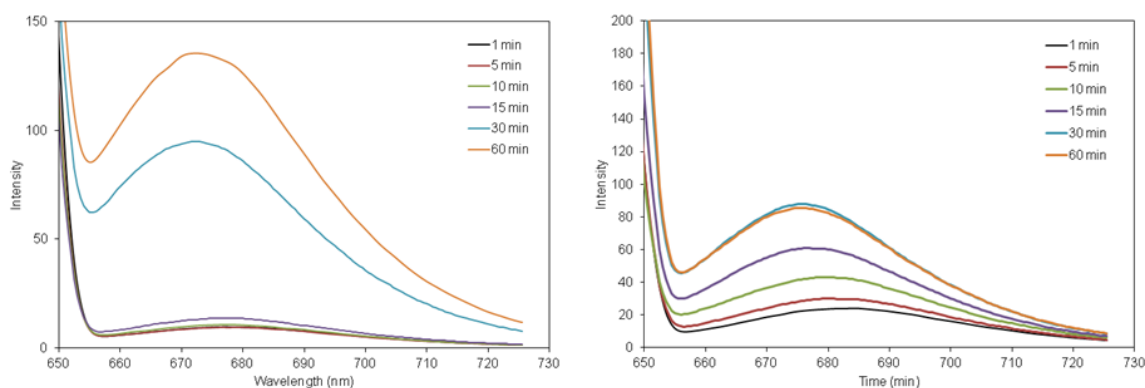

**Figure S1.** Changes in fluorescence of Nile blue with time in the presence of (left) **1** and (right) **2**. GdL was added at  $t=0$ .

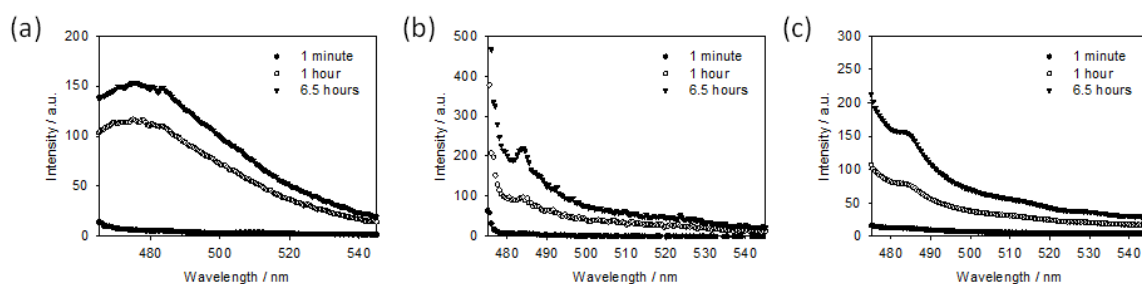

**Figure S2.** Changes in fluorescence of the dyes with time upon addition of solutions of **2** to GdL (8 mg/mL). (a) Thioflavin T ( $\lambda_{\text{ex}} = 455$  nm); DCVJ ( $\lambda_{\text{ex}} = 470$  nm); CCVJ (open circles) ( $\lambda_{\text{ex}} = 460$  nm).

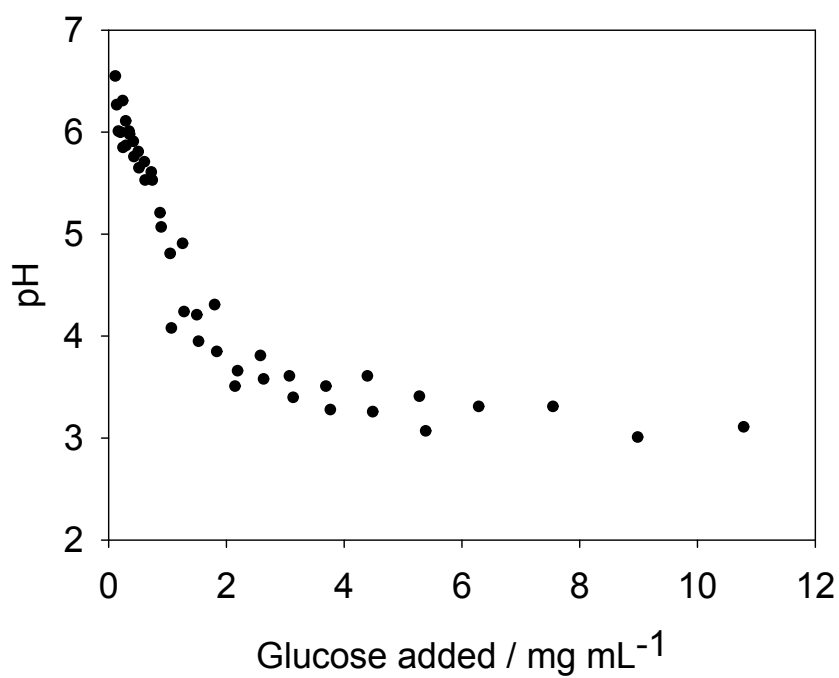

**Figure S3.** Plot of pH after 2 hours after addition of glucose to a solution of **1** (2.5 mg/mL), ThT and glucose oxidase.

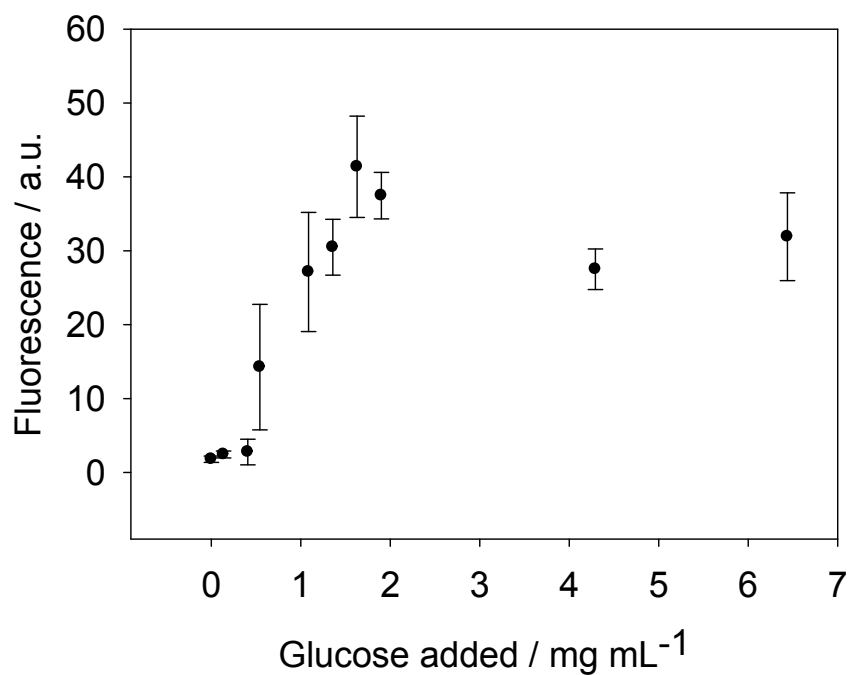

**Figure S4.** Plot of fluorescence intensity after 30 minutes after addition of glucose to a solution of **1** (2.5 mg/mL), ThT and glucose oxidase.
